# Supplementary material for: Structural insights into targeting of the colchicine binding site by ELR510444 and parbendazole to achieve rational drug design
Source: PubMed Central journal article supplement — RSC Adv. 2021 May 25;11(31):18938–44. doi: 10.1039/d1ra01173a (PMC9033620; doi:10.1039/d1ra01173a), 2021-05-25

**supplemental Figure. S1** Representative binding sensorgrams depicting the interaction of ELR510444 (A), parbendazoe (B), and colchicine (C) with  $\beta$ -tubulin assessed by SPR detection. Binding data were fit (black lines) to a simple kinetic model.

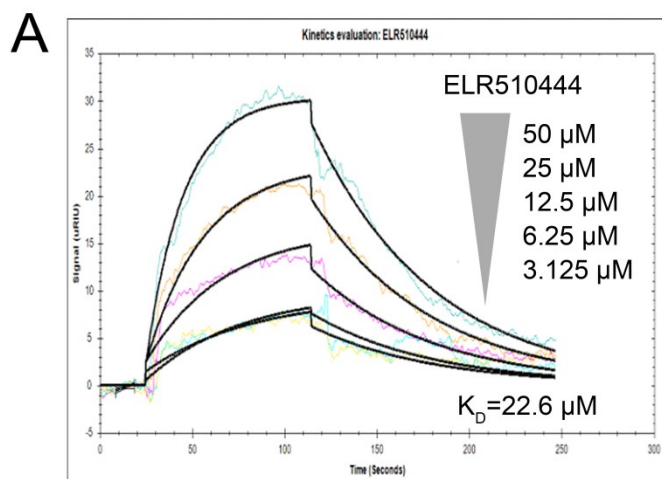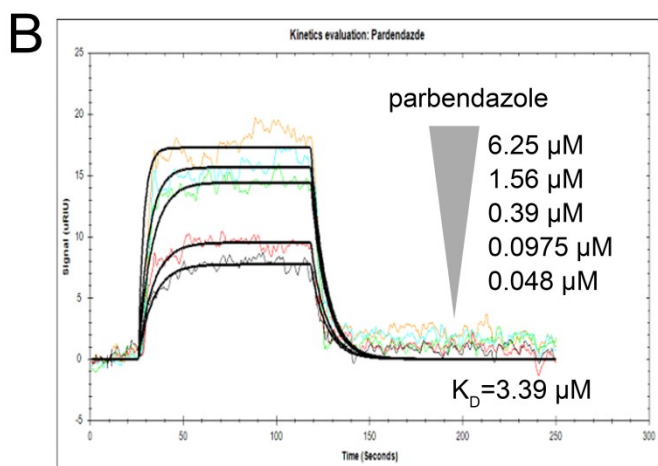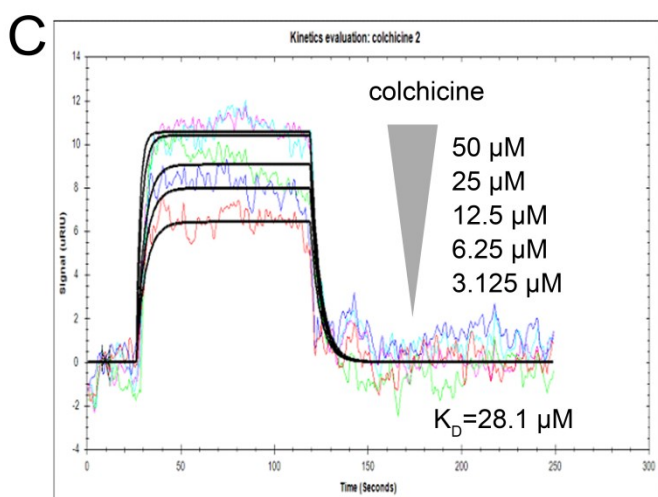

Supplement: RA-011-D1RA01173A-s001.pdf [file RA-011-D1RA01173A-s001.pdf]
